# Supplementary material
Source: publisher figshare collection journal article supplement (https://acs.figshare.com/ndownloader/files/7938718)
Supplement: Supplementary file 1 [file 7938718]

## Electronic Supplementary Information (ESI)

### Reduced Graphene Oxide/Fe<sub>3</sub>O<sub>4</sub>/Polyaniline Nanostructures as Electrode Materials for All-Solid-State Hybrid Supercapacitor

Sanjoy Mondal, Utpal Rana and Sudip Malik\*

*Polymer Science Unit, Indian Association for the Cultivation of Science,  
2A & 2B Raja S.C. Mullick Road, Jadavpur, Kolkata – 700032, India.*

*\*E-mail: psusm2@iacs.res.in*

#### Table of content

|                                                                |     |
|----------------------------------------------------------------|-----|
| 1. Synthesis of GO.....                                        | S2  |
| 2. Preparation of rGF and rGFP (Table S1).....                 | S2  |
| 3. Previous work report (Table S2).....                        | S3  |
| 4. Different scan CV study.....                                | S4  |
| 5. Synthesis of rGO/PANI .....                                 | S5  |
| 6. 2-Electrode electrochemical performance of rGO/PANI.....    | S6  |
| 7. 3-Electrode electrochemical performance .....               | S7  |
| 8. TEM and XRD study after 5000 <sup>th</sup> GCD cycles ..... | S8  |
| 9. Stress-Strain measurement of prepared device .....          | S9  |
| 10. Stress-Strain measurement of prepared device .....         | S10 |
| 11. BET study of synthesized composite .....                   | S11 |
| 12. Potential window optimization.....                         | S12 |
| 13. Reference.....                                             | S13 |

## Synthesis of Graphene Oxide (GO)

Graphite oxide (GO) was synthesized by a modified Hummers method from graphite powdered.<sup>S1, S2</sup> Following the typical synthesis of GO according to our earlier report. Briefly, 1.0g of graphite powdered slowly added to a 500mL conical flask placed in an ice bath (0-5 °C) equipped with 50 mL of conc. H<sub>2</sub>SO<sub>4</sub> and a magnetic bar with vigorous stirring while maintaining the reaction mixture fixed. After the addition, graphite powdered formed well dispersed black slurry and stirring continue for 2-3h. 1.0g of NaNO<sub>3</sub> and 5.0g KMnO<sub>4</sub> was added very slowly one by one at 0-5 °C with continuous stirring. The mixture was allowed to warm at room temperature (25 °C) and stirred for additional 2h. Again conical flask with reaction mixture placed in an ice-bath and 110 mL water was then added very slowly while the temperature was not raised more than 90 °C. The mixture was again poured into 200 mL of water, after which 7 mL of 30% H<sub>2</sub>O<sub>2</sub> was added carefully through inner wall of the conical flask. Immediately the colour of the solution changed from dark brown to pale yellow. The solution was then filtered using Millipore filter paper to get pale yellow residue. The residue was redispersed in water and centrifuged at 15000 rpm washed several times with water until the pH of the solution was neutral. The resultant solid material was dried in vacuum at 25 °C and stored in the ambient environment to get pure GO.

**Table S1** Preparation of rGF and rGFP

| Composite | Aniline | GO    | FeCl <sub>2</sub> | FeCl <sub>3</sub> | Reaction time | Reaction temperature |
|-----------|---------|-------|-------------------|-------------------|---------------|----------------------|
| rGF       | 0 µL    | 10 mg | 100 mg            | 0 mg              | 12 h          | 25°C                 |
| RGFP      | 100 µL  | 10 mg | 100 mg            | 0.8 mg            | 24 h          | 25°C                 |

**Previous work report (Table S2)**

| Materials                                                     | Specific capacitance                                       | Energy density | Power density | Cyclic stability                        | Electrolyte & Devices                                                              | References |
|---------------------------------------------------------------|------------------------------------------------------------|----------------|---------------|-----------------------------------------|------------------------------------------------------------------------------------|------------|
| rGO/Fe <sub>3</sub> O <sub>4</sub> /Polyaniline               | 283.4 F/g at current density of 1 A/g                      | 35.1 Wh/kg     | 1128 W/kg     | 78% after 5000 <sup>th</sup> cycles     | H <sub>3</sub> PO <sub>4</sub> /PVA gel electrolyte and solid-state device         | This work  |
| Graphene/Polyaniline                                          | 210 F/g at current density of 0.3 A/g                      | ~19.1 Wh/kg    | ~1400 W/kg    | High cyclic stability                   | 1M H <sub>2</sub> SO <sub>4</sub> electrolyte and solid-state device               | Ref S3     |
| MnO <sub>2</sub> template based PANI nanotubes                | 528 F/g at current density of 1 A/g                        | 84 Wh/kg       | 182 W/kg      | -----                                   | Ionic liquid/H <sub>2</sub> SO <sub>4</sub> gel electrolyte and solid-state device | Ref S4     |
| Stretchable polyaniline/graphene electrode                    | 261 F/g at current density 0.38 A/g                        | 23.2 Wh/kg     | 399 W/kg      | 89% after 1000 <sup>th</sup> cycles     | H <sub>3</sub> PO <sub>4</sub> -PVA gel electrolyte and solid-state device         | Ref S5     |
| Fe <sub>3</sub> O <sub>4</sub> @Carbon Nanosheet              | 586 F/g at current density of 0.5 A/g                      | 18.3 Wh/kg     | 351 W/kg      | 70.8% (5000 <sup>th</sup> cycles)       | KOH/PVA gel electrolyte and all solid-state device                                 | Ref S6     |
| Fe <sub>3</sub> O <sub>4</sub> /rGO nanocomposites            | 480 F/g at 5 A/g in three electrode system                 | 67 Wh/kg       | 5506 W/kg     | 100% after 1000 <sup>th</sup> cycles    | 1M KOH electrolyte and three electrode system                                      | Ref S7     |
| Porous Graphene/Polyaniline Nanocomposite                     | 864 F/g at current density of 1 A/g three electrode system | 24.02 Wh/kg    | 400.33 W/kg   | 85.6% after 500 <sup>th</sup> cycles    | PVA/H <sub>2</sub> SO <sub>4</sub> gel electrolyte and all solid-state device      | Ref S8     |
| CNT/graphene and Mn <sub>3</sub> O <sub>4</sub> -NPs/graphene | 72.6 at current density of 0.5 A/g                         | 32.7 Wh/kg     | ----          | 86.0 % after 10000 <sup>th</sup> cycles | Potassium polyacrylate (PAAK)/KCl gel electrolyte                                  | Ref S9     |
| Fe <sub>3</sub> O <sub>4</sub> NPs on Graphene sheets         | 220.1 at current density of 0.5 A/g                        | ----           | ----          | Stable after 3000 <sup>th</sup> cycles  | 1M KOH electrolyte and three electrode system                                      | Ref S10    |

### Different scan speed cyclic voltammetry study

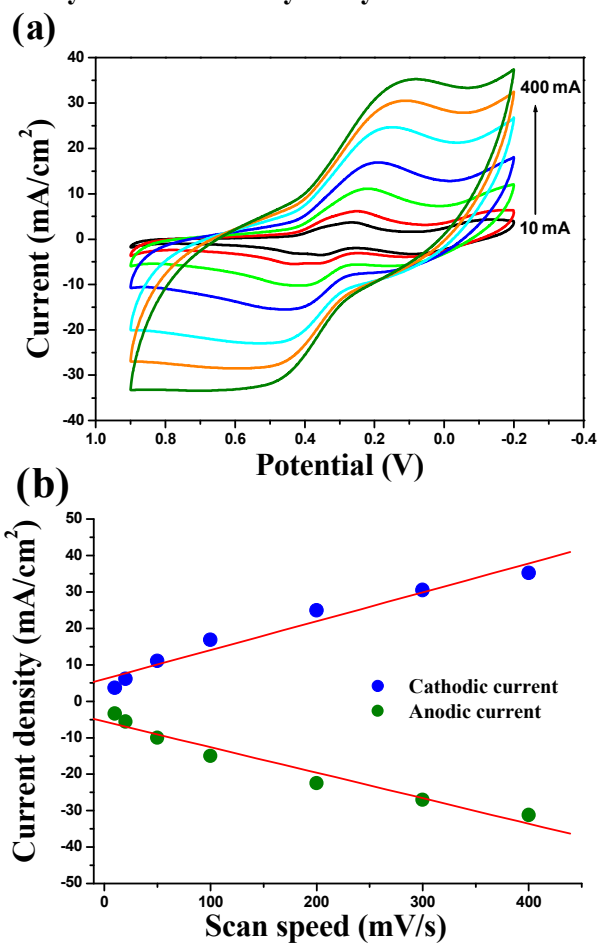

**Figure S1** Scan dependent CV study of rGO/Fe<sub>3</sub>O<sub>4</sub>/PANI composite in two electrode system at 25 °C temperature

## Synthesis of rGO/PANI

Synthesis of rGO/PANI composite: Graphene oxide (GO) was dispersed in water (10 mg in 10 mL). Aniline (108 mg, 1.0 mmol) was added to GO aqueous dispersion with continuous stirring for 30 min at 25 °C. After that, 5.0 mL of aqueous FeCl<sub>3</sub> solution (1.0 mmol) was added drop wise to resulting GO-aniline mixture with stirring at same temperature for 30 min. The resulting suspension was kept in low temperature (0-5 °C) for 24h with mechanical stirring. Finally, green color precipitate was thoroughly washed with water, methanol and dried under vacuum at 60 °C temperature over night and get greenish-black rGO/PANI powder.

## Electrochemical study of rGO/PANI composite

Electrochemical study: Electrochemical measurements of rGO/PANI composite were carried out by using same instrument (CHI6087E electrochemical workstation (CHI, USA)) by two-electrode system. Cyclic voltammetry (CV) and Galvanostatic charge-discharge studies were performed within the potential range of (-0.2 to 0.9 V) and specific capacitance ( $C_s$ ), energy density ( $E$ ) and power density ( $P$ ) were calculated by following equation 1, 2 and 3 respectively. The electrochemical results (2-electrodes method) were showed in **Figure S3** and compared in **Table S4**.

$$C_s = \frac{i \times \Delta t}{\Delta V \times m} \text{ (F/g)} \text{ ----- (1)}$$

$$E = \frac{1}{2} \times \Delta V^2 \times C_s \text{ (Wh/kg)} \text{ ----- (2)}$$

$$P = \frac{E}{\Delta t} \text{ (W/kg)} \text{ ----- (3)}$$

## 2-Electrode electrochemical study of rGO/PANI composite

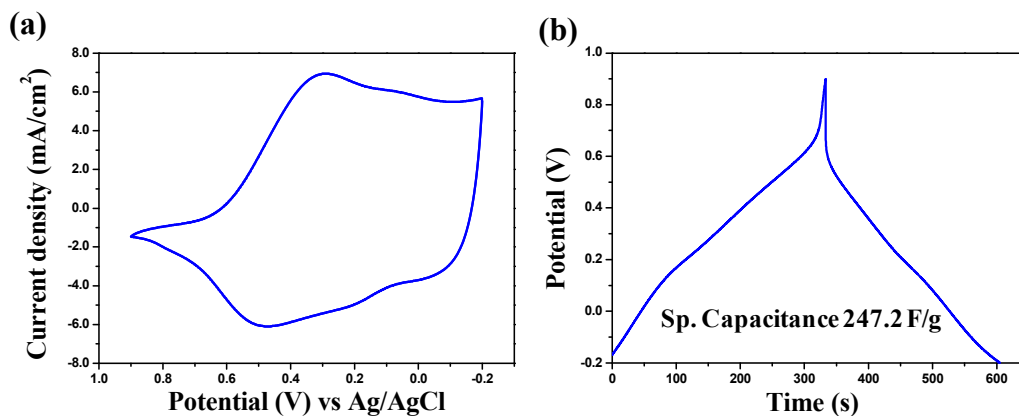

**Figure S2** All-solid-state electrochemical measurement carried out by **two electrode system** for rGO/PANI composites (a) CV study at scan speed 50 mV/sec; (b) GCD measurement at 1A/g current density.

**Table S4** Comparable electrochemical study for all composites (Two electrode)

| <sup>#</sup> Composite                   | Discharge time ( $\Delta t$ in sec) | Specific Capacitance ( $C_s$ in F/g) | Energy density ( $E$ in W h/kg) | Power density ( $P$ in W/kg) |
|------------------------------------------|-------------------------------------|--------------------------------------|---------------------------------|------------------------------|
| GO                                       | 6.1                                 | ~ 5.5                                | ~1.0                            | 590                          |
| rGO/Fe <sub>3</sub> O <sub>4</sub>       | 73.1                                | ~ 66.5                               | 11.2                            | 551.5                        |
| rGO/Fe <sub>3</sub> O <sub>4</sub> /PANI | 312.2                               | ~ 284                                | 47.7                            | 550.0                        |
| rGO/PANI                                 | 271.9                               | ~ 247                                | 41.5                            | 549.4                        |

<sup>#</sup> GCD data for all composites are at 1.0 A/g current density.

### Electrochemical performance of synthesized composite using three electrode system

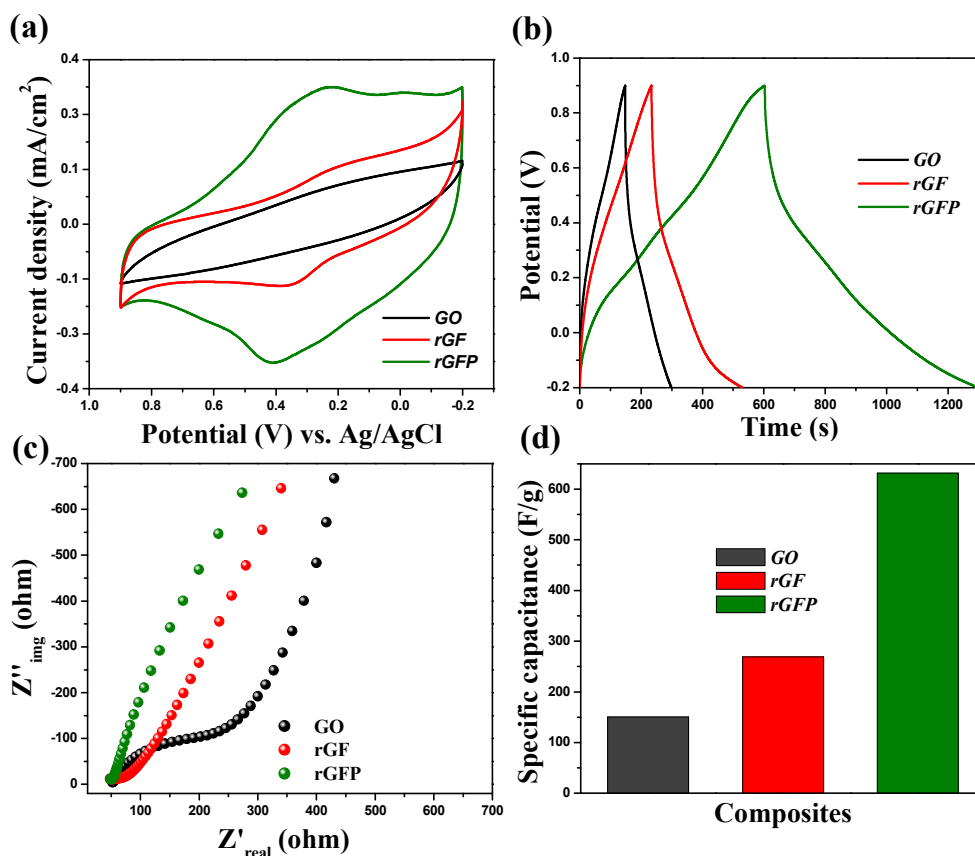

**Figure S3** Electrochemical measurement (3- electrode) of synthesized composites (a) CV study (scan rate of 50 mV/s); (b) GCD study (at 1 A/g current density); (c) electrochemical impedance study (Nyquist plot, at 0.1 - 100000 Hz range); (d) Bar plot for specific capacitance. All measurement was done in 0.5 M H<sub>3</sub>PO<sub>4</sub> aqueous solution.

**Table S3** Electrochemical performance of synthesized composite using **three electrode system**

| Composite                                | Sp. Capacitance ( $C_s$ )* | Energy density ( $E$ )* | Power density ( $P$ )* |
|------------------------------------------|----------------------------|-------------------------|------------------------|
| GO                                       | 136.9 F/g                  | 23 Wh/kg                | 549.8 W/kg             |
| rGO/Fe <sub>3</sub> O <sub>4</sub>       | 269.2 F/g                  | 45.2 Wh/kg              | 549.5 W/kg             |
| rGO/Fe <sub>3</sub> O <sub>4</sub> /PANI | 631.7 F/g                  | 106.1 Wh/kg             | 549.6 W/kg             |

\* Electrochemical data ( $C_s$ ,  $E$  and  $P$ ) at current density 1 A/g

## TEM and XRD study after 5000<sup>th</sup> GCD cycles

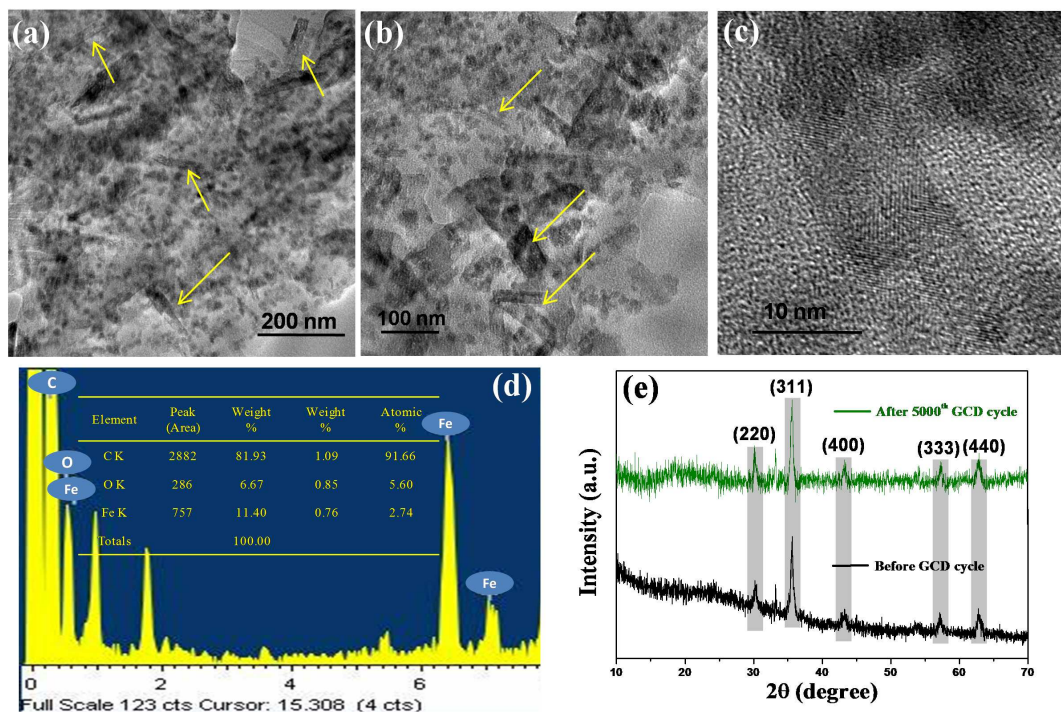

**Figure S4** (a)-(c) Low and high resolution TEM image; (d) EDX pattern and (e) Powder XRD signature of rGFP composite after 5000<sup>th</sup> cycles.



## Stress-Strain measurement of prepared device

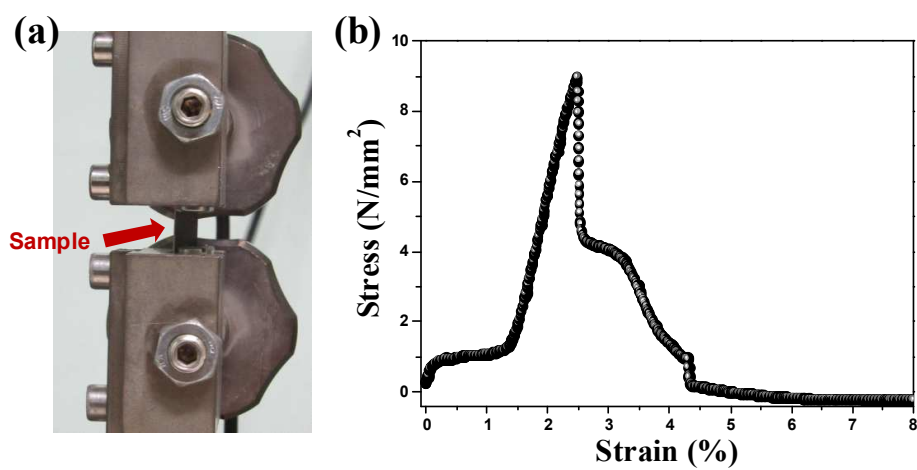

**Figure S5** (a) One instrumental snap short; (b) Stress-strain relationship curve of as prepared all solid state supercapacitor device

# BET study of synthesized composite

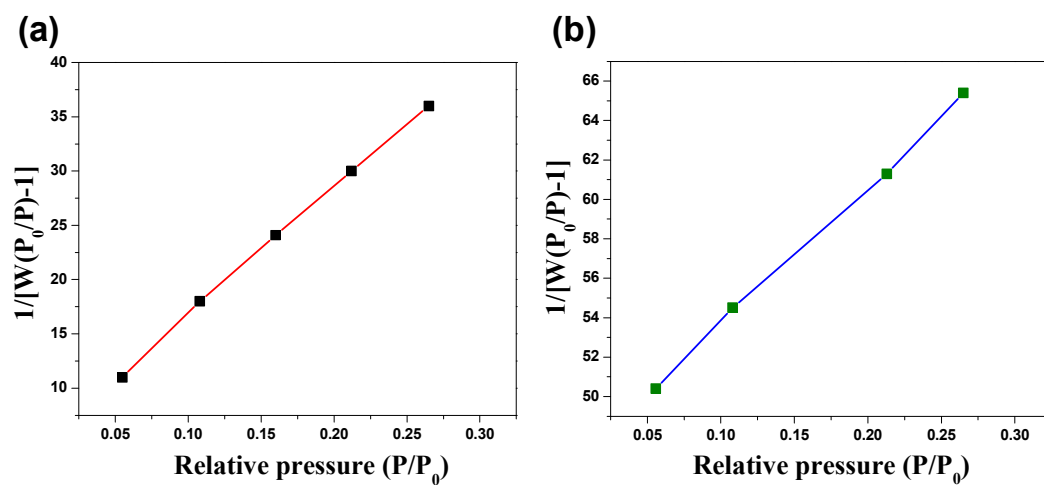

**Figure S6** BET curve for (a)  $rGO/Fe_3O_4$  and (b)  $rGO/Fe_3O_4/PANI$

**Table S6** Surface area of synthesized composite

| <i>Composite</i>   | <i>Surface area (<math>m^2/g</math>)</i> |
|--------------------|------------------------------------------|
| $rGO/Fe_3O_4$      | 28.278                                   |
| $rGO/Fe_3O_4/PANI$ | 29.731                                   |

### Potential window optimization for rGO/Fe<sub>3</sub>O<sub>4</sub>/PANI composite

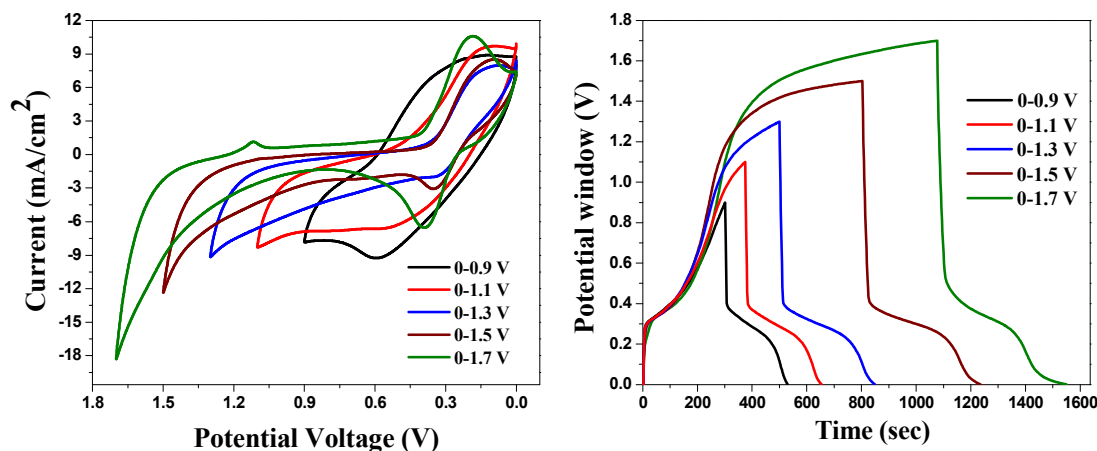

**Figure S7:** Electrochemical potential windows optimization study (a) CV curves of rGO/Fe<sub>3</sub>O<sub>4</sub>/PANI composite in different potential windows (0-0.9 to 0-1.7 V) at scan rate of 50 mV/s; (b) GCD curves obtained over different voltages (0-0.9 to 0-1.7 V) at a current density of 1 A/g.

To identify the optimum potential window, we have performed CV and GCD studies. In CV measurements, when the potential window is increased from 0-0.9 V to 0-1.7 V, the area under curve is decreased. It indicates that upto a certain voltage, synthesized rGO/Fe<sub>3</sub>O<sub>4</sub>/PANI composites behave as good capacitive material. Similarly in GCD results, with increasing potential window, voltage drop is increased and at the same time the charging time is more over discharging time. GCD study supports that upto a certain voltage, rGO/Fe<sub>3</sub>O<sub>4</sub>/PANI composites behave as low voltage drop capacitive material. From CV and GCD results, it is concluded that 0-1.3 V potential window is the optimum operating potential window for rGO/Fe<sub>3</sub>O<sub>4</sub>/PANI ternary composite.

## References

- S1.** Hummers Jr, W. S.; Offeman, R. E. Preparation of Graphitic Oxide. *J. Am. Chem. Soc.* **1958**, *80*, 1339-1339.
- S2.** Mondal, S.; Rana, U.; Malik, S. Graphene Quantum Dot-Doped Polyaniline Nanofiber as High Performance Supercapacitor Electrode Materials. *Chem. Commun.* **2015**, *51*, 12365-12368.
- S3.** Wu, Q.; Xu, Y.; Yao, Z.; Liu, A.; Shi, G. Supercapacitors Based on Flexible Graphene/Polyaniline Nanofiber Composite Films. *ACS Nano* **2010**, *4*, 1963-1970.
- S4.** Chen, W.; Rakhi, R.; Alshareef, H. N. Facile Synthesis of Polyaniline Nanotubes Using Reactive Oxide Templates for High Energy Density Pseudocapacitors. *J. Mater. Chem. A* **2013**, *1*, 3315-3324.
- S5.** Xie, Y.; Liu, Y.; Zhao, Y.; Tsang, Y. H.; Lau, S. P.; Huang, H.; Chai, Y. Stretchable All-Solid-State Supercapacitor with Wavy Shaped Polyaniline/Graphene Electrode. *J. Mater. Chem. A* **2014**, *2*, 9142-9149.
- S6.** Fan, H.; Niu, R.; Duan, J.; Liu, W.; Shen, W. Fe<sub>3</sub>O<sub>4</sub>@Carbon Nanosheets for All-Solid-State Supercapacitor Electrodes. *ACS Appl. Mater. Interfaces* **2016**, *8*, 19475-19483.
- S7.** Shi, W.; Zhu, J.; Sim, D. H.; Tay, Y. Y.; Lu, Z.; Zhang, X.; Sharma, Y.; Srinivasan, M.; Zhang, H.; Hng, H. H. Achieving High Specific Charge Capacitances in Fe<sub>3</sub>O<sub>4</sub>/Reduced Graphene Oxide Nanocomposites. *J. Mater. Chem.* **2011**, *21*, 3422-3427.
- S8.** Chi, K.; Zhang, Z.; Xi, J.; Huang, Y.; Xiao, F.; Wang, S.; Liu, Y. Freestanding Graphene Paper Supported Three-Dimensional Porous Graphene-Polyaniline Nanocomposite Synthesized by Inkjet Printing and in Flexible All-Solid-State Supercapacitor. *ACS Appl. Mater. Interfaces* **2014**, *6*, 16312-16319.

- S9.** Gao, H.; Xiao, F.; Ching, C. B.; Duan, H. Flexible All-Solid-State Asymmetric Supercapacitors Based on Free-Standing Carbon Nanotube/Graphene and  $\text{Mn}_3\text{O}_4$  Nanoparticle/Graphene Paper Electrodes. *ACS Appl. Mater. Interfaces* **2012**, *4*, 7020-7026.
- S10.** Wang, Q.; Jiao, L.; Du, H.; Wang, Y.; Yuan, H.  $\text{Fe}_3\text{O}_4$  Nanoparticles Grown on Graphene as Advanced Electrode Materials for Supercapacitors. *J. Power Sources* **2014**, *245*, 101-106.
